# Supplementary material for: Degradation and forgone removals increase the carbon impact of intact forest loss by 626%
Source: PubMed Central journal article supplement — Sci Adv. 2019 Oct 30;5(10):eaax2546. doi: 10.1126/sciadv.aax2546 (PMC6821461; doi:10.1126/sciadv.aax2546), 2019-10-30
Supplement: aax2546_SM.pdf [file aax2546_SM.pdf]

## Supplementary Materials for

### **Degradation and forgone removals increase the carbon impact of intact forest loss by 626%**

Sean L. Maxwell\*, Tom Evans, James E. M. Watson, Alexandra Morel, Hedley Grantham, Adam Duncan, Nancy Harris, Peter Potapov, Rebecca K. Runtz, Oscar Venter, Stephanie Wang, Yadvinder Malhi

\*Corresponding author. Email: smaxwell@uq.edu.au

Published 30 October 2019, *Sci. Adv.* **5**, eaax2546 (2019)  
DOI: 10.1126/sciadv.aax2546

#### **This PDF file includes:**

Fig. S1. Estimated annual rate of carbon sequestration inside intact forests under alternative scenarios.

Fig. S2. Full accounting of the carbon impact of intact forest loss assuming the onset of carbon saturation in intact forests in Latin America by 2030.

Fig. S3. Full accounting of the carbon impact of intact forest loss assuming the onset of carbon saturation in all tropical intact forests by 2030.

Table S1. Country-level estimates on the proportion of selective logging that uses responsible forest management techniques and emission factors for responsible and conventional logging practices.

Table S2. Intact forest landscape reduction between 2000 and 2013 in countries across the global tropics.

Table S3. Country-level statistics required to estimate carbon emissions from defaunation.

Table S4. Regional carbon sequestration rates for intact forest areas and reforestation.

Table S5. Assumed time scales and trajectories of carbon dynamics from different forest processes.

References (65–83)

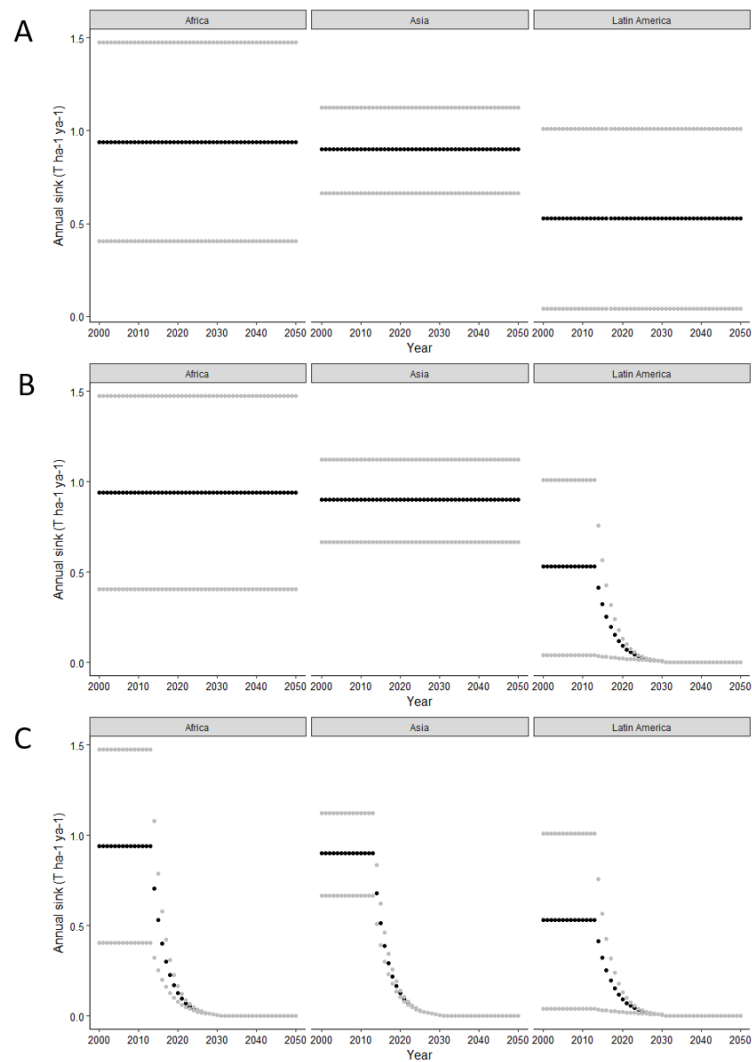

**Fig. S1. Estimated annual rate of carbon sequestration inside intact forests under alternative scenarios. (A)** sequestration rates continue at rates estimated for the 2000s; **(B)** intact forests located in Latin America will reach carbon saturation by 2030; and **(C)** all tropical intact forests will reach carbon saturation by 2030.

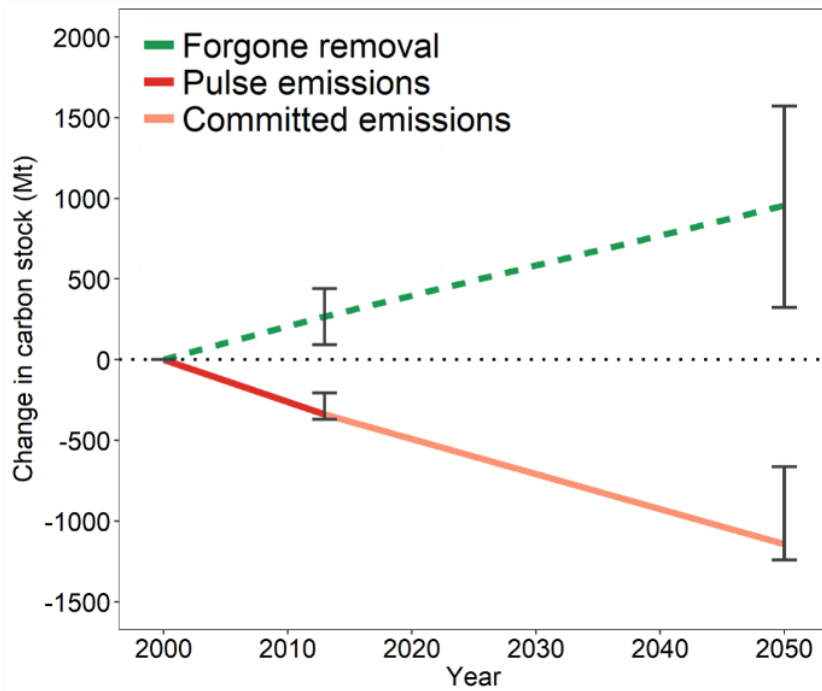

**Fig. S2.** Full accounting of the carbon impact of intact forest loss assuming the onset of carbon saturation in intact forests in Latin America by 2030.

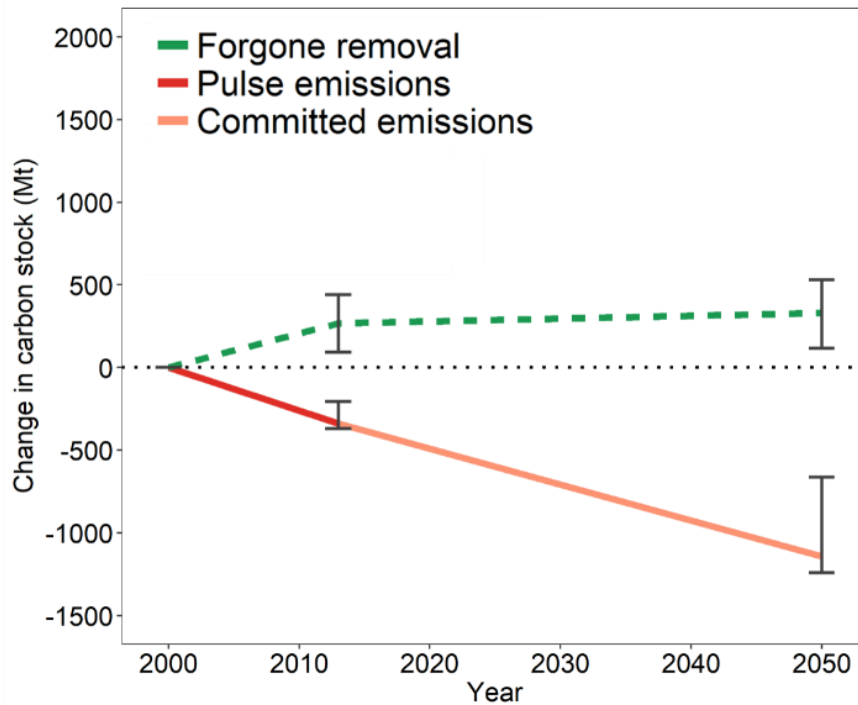

**Fig. S3.** Full accounting of the carbon impact of intact forest loss assuming the onset of carbon saturation in all tropical intact forests by 2030.

**Table S1. Country-level estimates on the proportion of selective logging that employs responsible forest management techniques and emission factors for responsible and conventional logging practices.** Proportional estimates of responsible logging were drawn from the International Tropical Timber Organisation<sup>58</sup>. In cases where estimates were not available for a particular country, they were set to mean of estimates from countries in the same continent (denoted with \*). Emission factors were drawn from a meta-analysis of retention of carbon stocks after selective logging of tropical forests<sup>20</sup>. In cases where emission factors were not available for a particular country, they were set to median of estimates from countries in the same continent (denoted with \*).

| Country                  | Proportion of logging that is responsible | Emission factors |          |              |                |
|--------------------------|-------------------------------------------|------------------|----------|--------------|----------------|
|                          |                                           | Responsible      | Source   | Conventional | Source         |
| Angola                   | 0.1*                                      | 0.06             | *        | 0.05         | *              |
| Argentina                | 0.12*                                     | 0.09             | *        | 0.18         | *              |
| Australia                | 0.12*                                     | 0.29             | *        | 0.38         | *              |
| Belize                   | 0.12*                                     | 0.09             | *        | 0.18         | *              |
| Bhutan                   | 0.12*                                     | 0.29             | *        | 0.38         | *              |
| Bolivia                  | 0.07                                      | 0.09             | *        | 0.05         | 15,65          |
| Brazil                   | 0.02                                      | 0.09             | 25,66-69 | 0.24         | 15,25,66,70-73 |
| Brunei Darussalam        | 0.12*                                     | 0.29             | *        | 0.38         | *              |
| Cambodia                 | 0                                         | 0.29             | *        | 0.38         | *              |
| Cameroon                 | 0.17                                      | 0.06             | *        | 0.05         | *              |
| Central African Republic | 0                                         | 0.06             | *        | 0.05         | *              |
| Colombia                 | 0.06                                      | 0.09             | *        | 0.18         | *              |
| Costa Rica               | 0.12*                                     | 0.09             | *        | 0.18         | *              |
| Côte d'Ivoire            | 0.1                                       | 0.06             | *        | 0.05         | *              |
| DR Congo                 | 0.16                                      | 0.06             | *        | 0.05         | *              |
| Dominican Republic       | 0.12*                                     | 0.09             | *        | 0.18         | *              |
| Ecuador                  | 0.09                                      | 0.09             | *        | 0.18         | *              |
| Equatorial Guinea        | 0.1*                                      | 0.06             | *        | 0.05         | *              |
| Ethiopia                 | 0.1*                                      | 0.06             | *        | 0.05         | *              |
| French Guiana            | 0.1*                                      | 0.09             | *        | 0.41         | 74             |
| Gabon                    | 0.23                                      | 0.06             | 75       | 0.06         | 75             |
| Guatemala                | 0.55                                      | 0.09             | *        | 0.18         | *              |
| Guyana                   | 0.05                                      | 0.09             | *        | 0.12         | 75             |
| Honduras                 | 0.25                                      | 0.09             | *        | 0.18         | *              |
| Indonesia                | 0.08                                      | 0.29             | *        | 0.20         | 75,76          |
| Lao PDR                  | 0.12*                                     | 0.29             | *        | 0.38         | *              |
| Liberia                  | 0                                         | 0.06             | *        | 0.05         | *              |
| Madagascar               | 0.1*                                      | 0.06             | *        | 0.05         | *              |
| Malaysia                 | 0.02                                      | 0.28             | 77       | 0.51         | 77,78          |
| Mexico                   | 0.09                                      | 0.09             | *        | 0.18         | *              |
| Myanmar                  | 0.02                                      | 0.29             | *        | 0.38         | *              |
| Nicaragua                | 0.12*                                     | 0.09             | *        | 0.18         | *              |
| Nigeria                  | 0.35                                      | 0.06             | *        | 0.05         | *              |
| Panama                   | 0.13                                      | 0.09             | *        | 0.18         | *              |
| Papua New Guinea         | 0.02                                      | 0.31             | 79       | 0.29         | 80,81          |

|                   |       |      |   |      |       |
|-------------------|-------|------|---|------|-------|
| Paraguay          | 0.12* | 0.09 | * | 0.18 | *     |
| Peru              | 0.09  | 0.09 | * | 0.18 | *     |
| Philippines       | 0.02  | 0.29 | * | 0.48 | 82    |
| Republic of Congo | 0.16  | 0.06 | * | 0.03 | 75,83 |
| Solomon Islands   | 0.12* | 0.29 | * | 0.38 | *     |
| Suriname          | 0.05  | 0.09 | * | 0.18 | *     |
| Tanzania          | 0.1*  | 0.06 | * | 0.05 | *     |
| Thailand          | 0.04  | 0.29 | * | 0.38 | *     |
| Vanuatu           | 0.12* | 0.29 | * | 0.38 | *     |
| Venezuela         | 0.04  | 0.09 | * | 0.18 | *     |
| Viet Nam          | 0.12* | 0.29 | * | 0.38 | *     |

**Table S2. Intact forest landscape reduction between 2000 and 2013 in countries across the global tropics.** Table also shows areas forest clearance and fire that occurred in lost IFLs between 2000 and 2013, and areas of new forest edges and selective logging that are expected to occur in lost IFLs between 2013 and 2050.

| country                          | IFL area lost, 2000-2013 (ha) | Mean forest cover, 2000 (%) | Forest clearance (ha) | Burned area (ha) | New forest edges (ha) | Selective logging (ha) | Forest loss to edge ratio |
|----------------------------------|-------------------------------|-----------------------------|-----------------------|------------------|-----------------------|------------------------|---------------------------|
| Angola                           | 13,266                        | 88%                         | 33                    | -                | 9,708                 | 304                    | 294                       |
| Argentina                        | 43,152                        | 87%                         | 1,606                 | 523              | 18,624                | 9,432                  | 12                        |
| Australia                        | 84,860                        | 91%                         | 4,580                 | 637              | 48,608                | -                      | 11                        |
| Belize                           | 19,876                        | 97%                         | 1,998                 | 1                | 9,386                 | 4,646                  | 5                         |
| Bhutan                           | 879                           | 55%                         | 11                    | -                | 133                   | 454                    | 12                        |
| Bolivia                          | 4,405,968                     | 95%                         | 213,900               | 57,595           | 1,601,257             | 538,722                | 7                         |
| Brazil                           | 14,944,849                    | 99%                         | 1,688,543             | 53,455           | 4,921,169             | 1,426,854              | 3                         |
| Brunei Darussalam                | 33,829                        | 97%                         | 1,503                 | -                | 16,037                | 1,433                  | 11                        |
| Cambodia                         | 43,913                        | 86%                         | 315                   | -                | 6,991                 | 620                    | 22                        |
| Cameroon                         | 1,336,322                     | 89%                         | 3,921                 | -                | 397,123               | 377,745                | 101                       |
| Central African Republic         | 213,678                       | 96%                         | 454                   | 1                | 47,739                | 63,010                 | 105                       |
| Colombia                         | 408,082                       | 99%                         | 16,130                | 28               | 201,370               | 5,466                  | 12                        |
| Costa Rica                       | 8,631                         | 94%                         | 60                    | -                | 4,091                 | -                      | 68                        |
| Côte d'Ivoire                    | 80,131                        | 74%                         | 1,693                 | -                | 47,270                | 4,820                  | 28                        |
| Democratic Republic of the Congo | 2,019,972                     | 99%                         | 132,145               | 1                | 930,342               | 414,579                | 7                         |
| Dominican Republic               | 23,083                        | 91%                         | 6,270                 | 962              | 14,440                | 769                    | 2                         |
| Ecuador                          | 280,776                       | 98%                         | 1,421                 | -                | 72,677                | 23,013                 | 51                        |
| Equatorial Guinea                | 193,131                       | 89%                         | 575                   | -                | 83,857                | 28,657                 | 146                       |
| Ethiopia                         | 21,361                        | 79%                         | 277                   | -                | 16,646                | -                      | 60                        |
| French Guiana                    | 374,166                       | 99%                         | 3,309                 | -                | 118,966               | 45,600                 | 36                        |
| Gabon                            | 2,099,415                     | 91%                         | 7,277                 | -                | 467,264               | 1,006,076              | 64                        |
| Guatemala                        | 75,253                        | 96%                         | 4,744                 | -                | 33,034                | 3,093                  | 7                         |
| Guyana                           | 1,637,140                     | 99%                         | 15,885                | -                | 700,106               | 99,692                 | 44                        |

|                   |           |     |         |        |           |         |    |
|-------------------|-----------|-----|---------|--------|-----------|---------|----|
| Honduras          | 191,976   | 98% | 12,538  | -      | 107,681   | 2,431   | 9  |
| Indonesia         | 3,791,988 | 95% | 112,735 | 57     | 1,710,168 | 181,018 | 15 |
| Lao PDR           | 409,044   | 83% | 13,007  | 230    | 188,860   | 28,130  | 15 |
| Liberia           | 152,487   | 80% | 593     | -      | 41,871    | 46,102  | 71 |
| Madagascar        | 303,238   | 96% | 20,250  | 145    | 224,678   | 8,911   | 11 |
| Malaysia          | 529,842   | 96% | 55,595  | -      | 292,906   | 87,534  | 5  |
| Mexico            | 39,986    | 95% | 2,143   | -      | 21,725    | 4,883   | 10 |
| Myanmar           | 1,442,515 | 85% | 9,416   | 47,727 | 607,737   | 185,176 | 61 |
| Nicaragua         | 392,828   | 97% | 35,103  | -      | 294,540   | 17,311  | 8  |
| Nigeria           | 14,583    | 64% | 571     | -      | 10,782    | 1,421   | 19 |
| Panama            | 285,104   | 98% | 2,000   | -      | 123,394   | 6,048   | 62 |
| Papua New Guinea  | 2,098,828 | 95% | 32,582  | -      | 1,006,271 | 101,264 | 31 |
| Paraguay          | 3,514,566 | 49% | 223,470 | 32,065 | 1,437,984 | 350,675 | 6  |
| Peru              | 3,408,460 | 98% | 113,774 | 84     | 1,564,310 | 120,103 | 14 |
| Philippines       | 36,094    | 93% | 797     | -      | 26,935    | 201     | 34 |
| Republic of Congo | 2,266,479 | 95% | 16,453  | -      | 515,588   | 940,989 | 31 |
| Solomon Islands   | 414,032   | 96% | 5,025   | -      | 248,403   | 26,393  | 49 |
| Suriname          | 616,106   | 99% | 6,180   | -      | 153,497   | 53,335  | 25 |
| Tanzania          | 1,647     | 59% | 26      | 208    | 1,390     | -       | 53 |
| Thailand          | 146,446   | 89% | 3,152   | 20,760 | 79,311    | 8,234   | 23 |
| Vanuatu           | 261       | 93% | -       | -      | -         | -       | NA |
| Venezuela         | 441,628   | 98% | 12,141  | 26     | 242,836   | 11,099  | 20 |
| Vietnam           | 103,816   | 92% | 626     | -      | 39,703    | 6,393   | 63 |

**Table S3. Country-level statistics required to estimate carbon emissions from defaunation.** Relative abundances of animal-dispersed tree species and differences in carbon stocks were derived from Osuri, et al.<sup>17</sup>. In cases where these data were not available for a country, they were set to median of estimates from countries in the same continent (denoted with \*).

| Country                  | Relative abundances (%) of animal-dispersed species at each site | Differences in median % change in carbon stocks between defaunation and species-based control scenarios (D-C2) at 100% extirpation levels | Source        |
|--------------------------|------------------------------------------------------------------|-------------------------------------------------------------------------------------------------------------------------------------------|---------------|
| Angola                   | 93                                                               | -6.6                                                                                                                                      | *             |
| Argentina                | 82                                                               | -3.41                                                                                                                                     | *             |
| Australia                | 73                                                               | -0.52                                                                                                                                     | <sup>17</sup> |
| Belize                   | 82                                                               | -3.41                                                                                                                                     | *             |
| Bhutan                   | 73                                                               | -0.52                                                                                                                                     | *             |
| Bolivia                  | 82                                                               | -3.41                                                                                                                                     | *             |
| Brazil                   | 82                                                               | -3.41                                                                                                                                     | *             |
| Brunei Darussalam        | 73                                                               | -0.52                                                                                                                                     | *             |
| Cambodia                 | 73                                                               | -0.52                                                                                                                                     | *             |
| Cameroon                 | 93                                                               | -13.85                                                                                                                                    | <sup>17</sup> |
| Central African Republic | 93                                                               | -6.6                                                                                                                                      | *             |
| Colombia                 | 82                                                               | -3.41                                                                                                                                     | *             |
| Costa Rica               | 82                                                               | -2.55                                                                                                                                     | <sup>17</sup> |
| Côte d'Ivoire            | 93                                                               | -6.6                                                                                                                                      | *             |
| DR Congo                 | 93                                                               | -6.6                                                                                                                                      | *             |
| Dominican Republic       | 82                                                               | -3.41                                                                                                                                     | *             |
| Ecuador                  | 82                                                               | -3.41                                                                                                                                     | *             |
| Equatorial Guinea        | 93                                                               | -6.6                                                                                                                                      | *             |
| Ethiopia                 | 93                                                               | -6.6                                                                                                                                      | *             |
| French Guiana            | 82                                                               | -3.41                                                                                                                                     | *             |
| Gabon                    | 93                                                               | -6.6                                                                                                                                      | *             |
| Guatemala                | 82                                                               | -3.41                                                                                                                                     | *             |
| Guyana                   | 82                                                               | -3.41                                                                                                                                     | *             |
| Honduras                 | 82                                                               | -3.41                                                                                                                                     | *             |
| Indonesia                | 67                                                               | -0.12                                                                                                                                     | <sup>17</sup> |
| Lao PDR                  | 73                                                               | -0.52                                                                                                                                     | *             |
| Liberia                  | 93                                                               | -6.6                                                                                                                                      | *             |
| Madagascar               | 93                                                               | -6.6                                                                                                                                      | *             |
| Malaysia                 | 73                                                               | -0.89                                                                                                                                     | <sup>17</sup> |
| Mexico                   | 82                                                               | -3.41                                                                                                                                     | *             |
| Myanmar                  | 73                                                               | -0.52                                                                                                                                     | *             |
| Nicaragua                | 82                                                               | -3.41                                                                                                                                     | *             |
| Nigeria                  | 93                                                               | -6.6                                                                                                                                      | *             |
| Panama                   | 82                                                               | -3.41                                                                                                                                     | <sup>17</sup> |
| Papua New Guinea         | 73                                                               | -0.52                                                                                                                                     | *             |
| Paraguay                 | 82                                                               | -3.41                                                                                                                                     | *             |
| Peru                     | 90                                                               | -5.51                                                                                                                                     | <sup>17</sup> |
| Philippines              | 73                                                               | -0.52                                                                                                                                     | *             |



|                   |    |       |    |
|-------------------|----|-------|----|
| Republic of Congo | 92 | -3.13 | 17 |
| Solomon Islands   | 73 | -0.52 | *  |
| Suriname          | 82 | -3.41 | *  |
| Tanzania          | 98 | -6.6  | 17 |
| Thailand          | 73 | -0.52 | *  |
| Vanuatu           | 73 | -0.52 | *  |
| Venezuela         | 82 | -3.41 | *  |
| Viet Nam          | 73 | -0.52 | *  |

**Table S4. Regional carbon sequestration rates for intact forest areas and reforestation.**

| Region        | Intact forest | Reforestation |
|---------------|---------------|---------------|
| Africa        | 0.94          | 1.47          |
| Asia          | 0.9           | 3.53          |
| South America | 0.53          | 4.56          |

**Table S5. Assumed time scales and trajectories of carbon dynamics from different forest processes.**

| Process                     | Time scale | Trajectory                                                                                                                                                  |
|-----------------------------|------------|-------------------------------------------------------------------------------------------------------------------------------------------------------------|
| Clearance                   | 13 yrs     | Linear, applied across 13 years                                                                                                                             |
| Regrowth                    | 37 yrs     | Linear, at rates observed in regrowing forests in the 2000s                                                                                                 |
| Selective logging           | 37 yrs     | Linear, applied across 37 years                                                                                                                             |
| Fragmentation               | 37 yrs     | Linear, applied across 37 years                                                                                                                             |
| Defaunation                 | 100 yrs    | Linear, applied across 100 years                                                                                                                            |
| Intact sink, scenario one   | 50 yrs     | Linear, at rates observed in intact forests in the 2000s                                                                                                    |
| Intact sink, scenario two   | 50 yrs     | Exponential decay, intact forests in Latin America reach saturation by 2030; Linear for all other regions, at rates observed in intact forests in the 2000s |
| Intact sink, scenario three | 50 yrs     | Exponential decay, all tropical intact forests reach saturation by 2030                                                                                     |
